# Supplementary material for: A novel platform for heterologous gene expression in Trichoderma reesei (Teleomorph Hypocrea jecorina)
Source: PubMed Central journal article supplement (PMC4015775; doi:10.1186/1475-2859-13-33), 2014-03-06

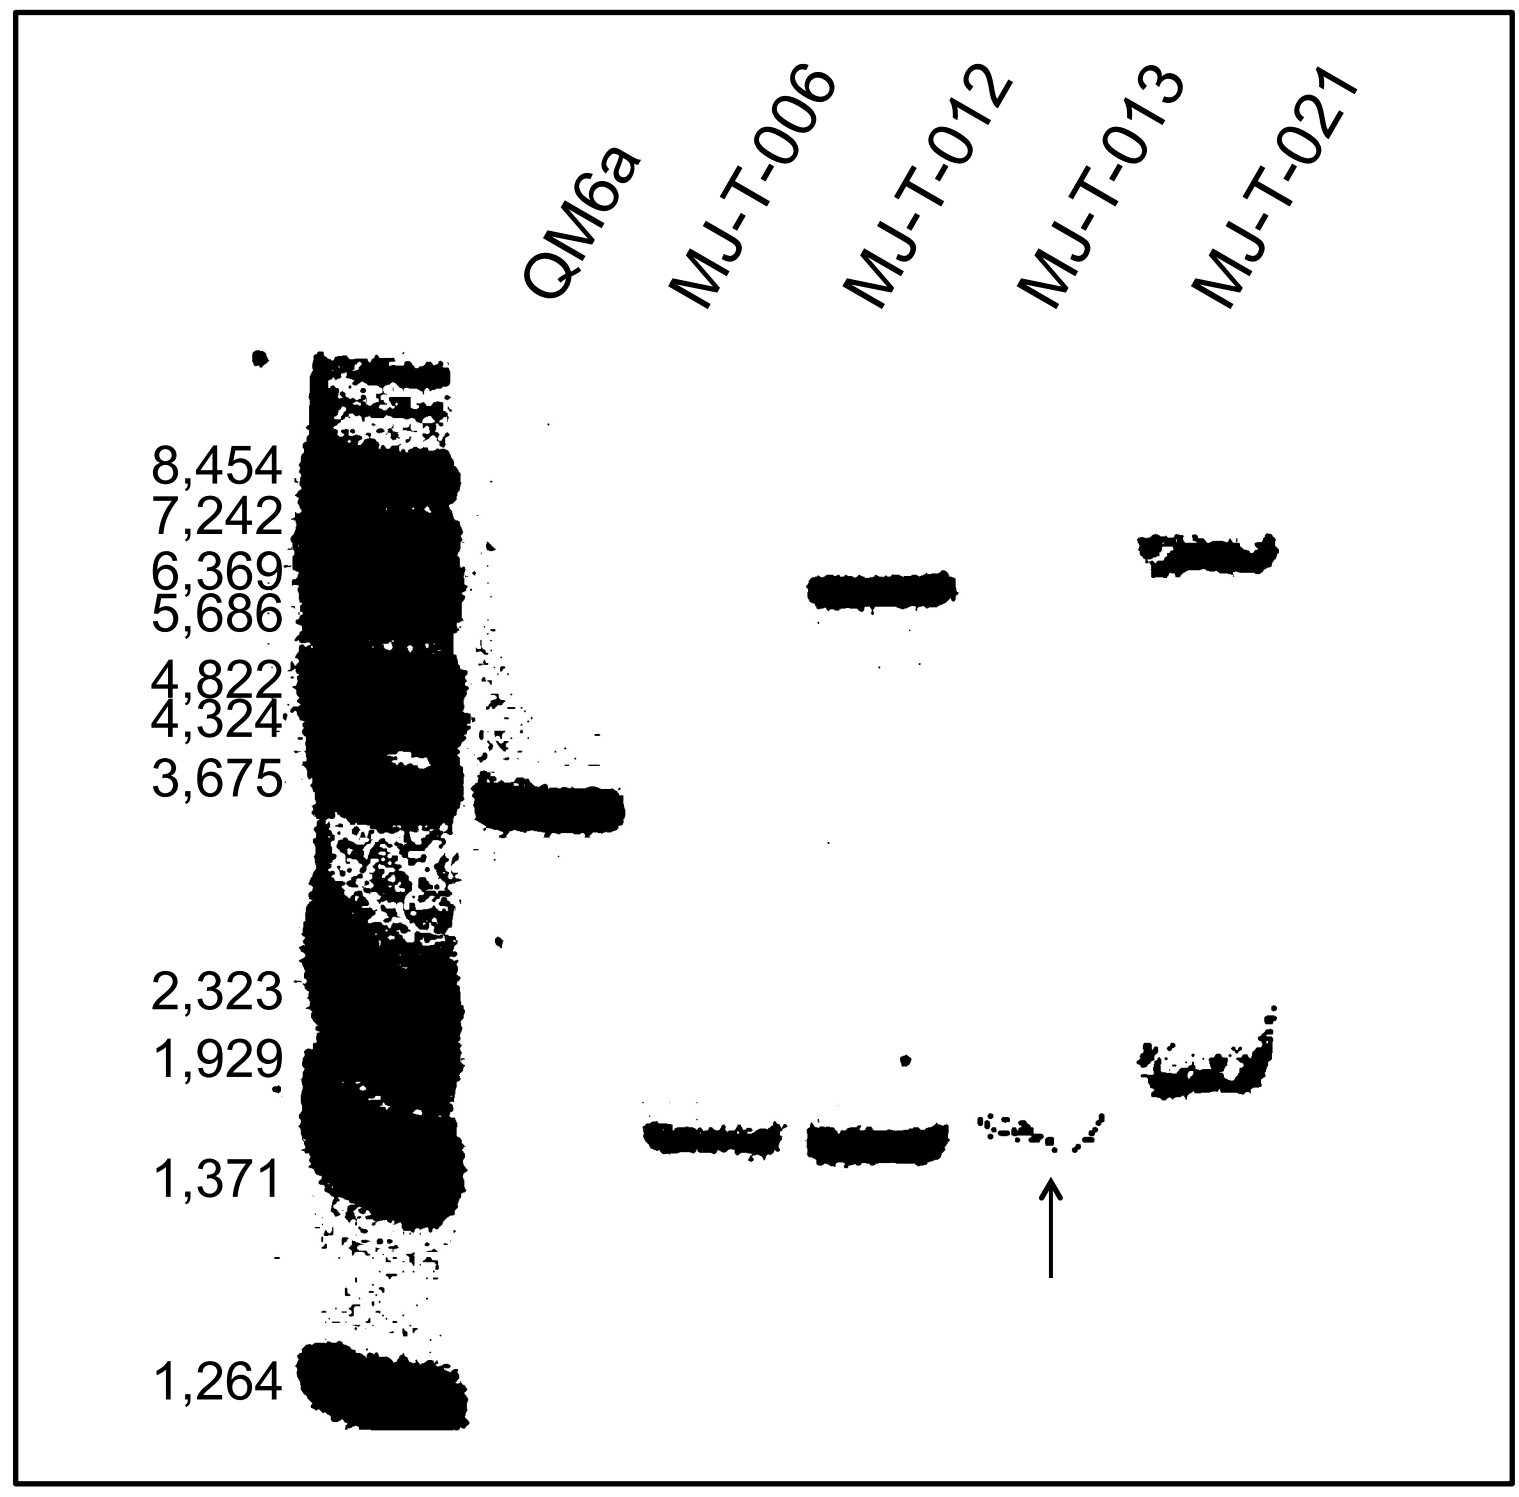

Supplement: 1475-2859-13-33-S2.pdf [file 1475-2859-13-33-S2.pdf]
