# Supplementary material for: A novel platform for heterologous gene expression in Trichoderma reesei (Teleomorph Hypocrea jecorina)
Source: PubMed Central journal article supplement (PMC4015775; doi:10.1186/1475-2859-13-33), 2014-03-06

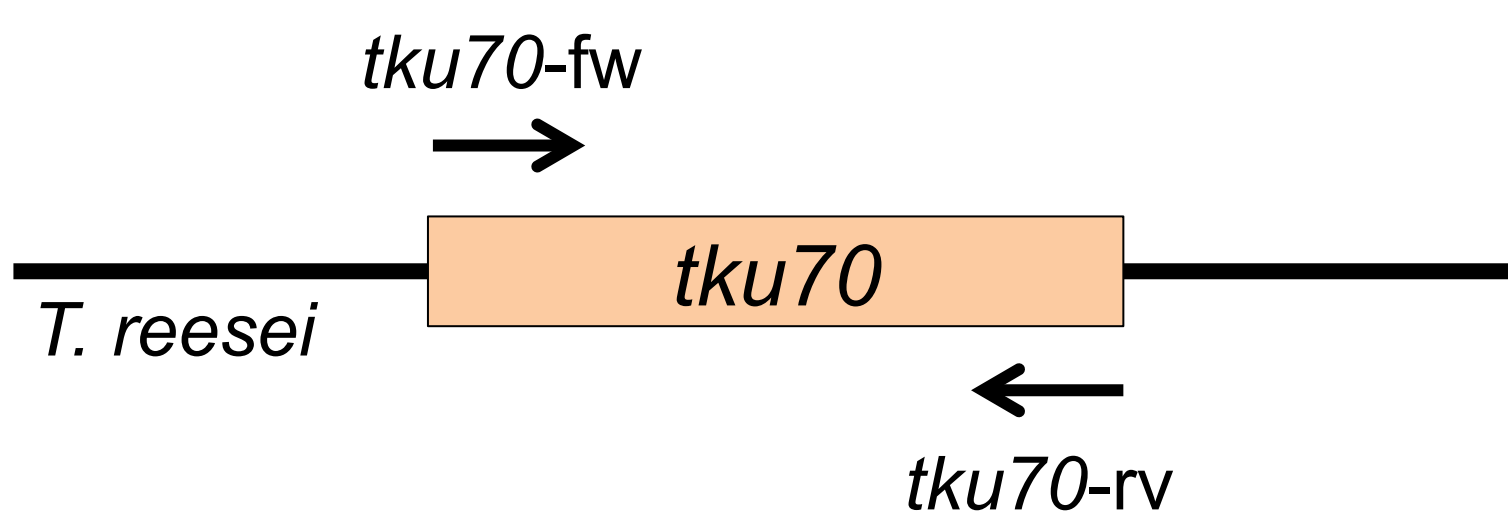

1 ↓

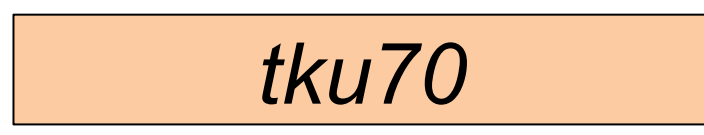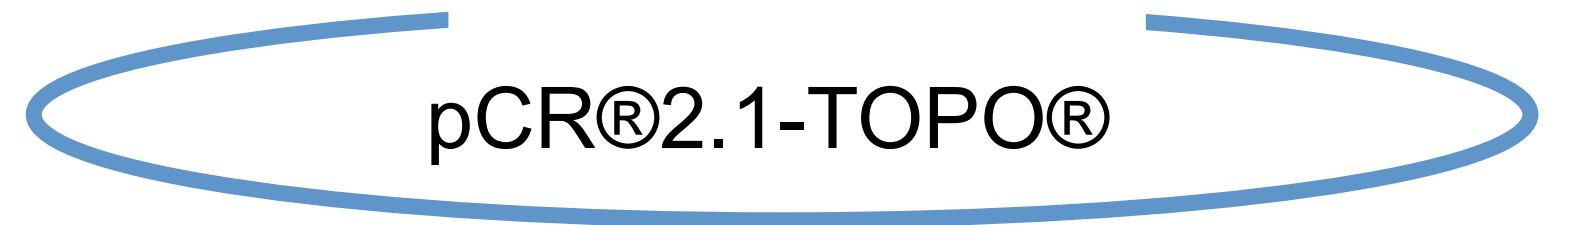

2 ↘

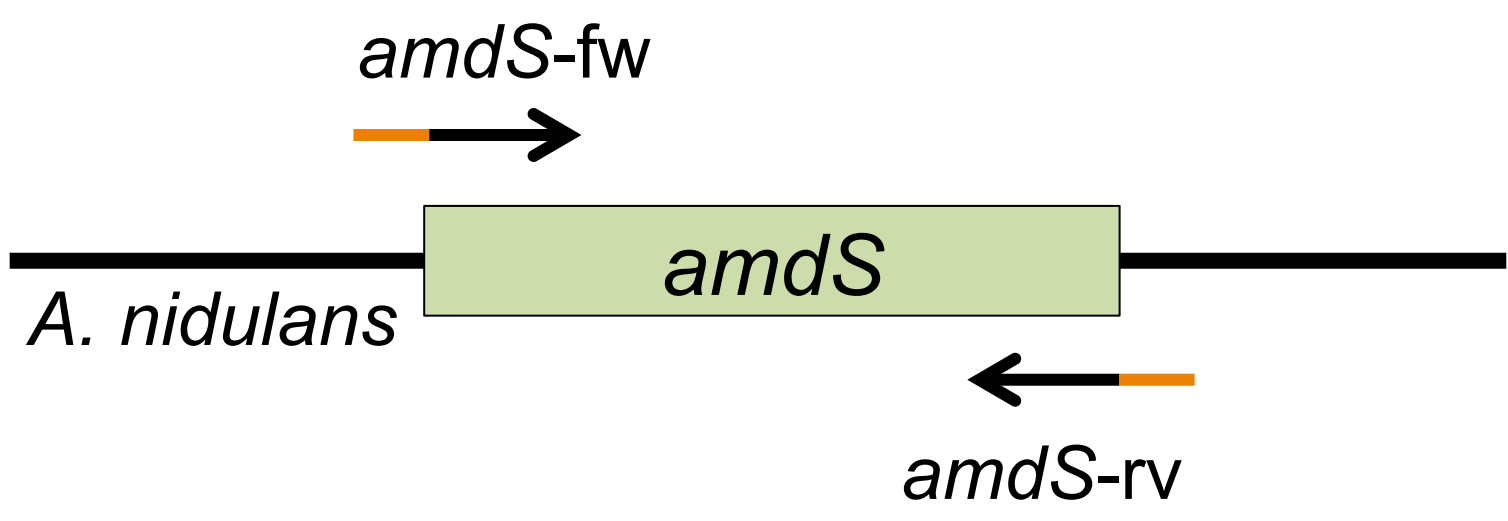

4 ↓

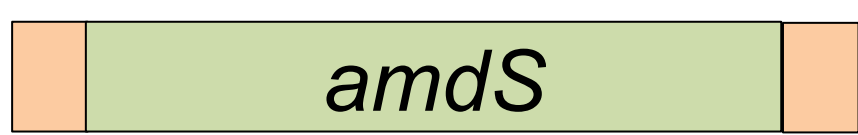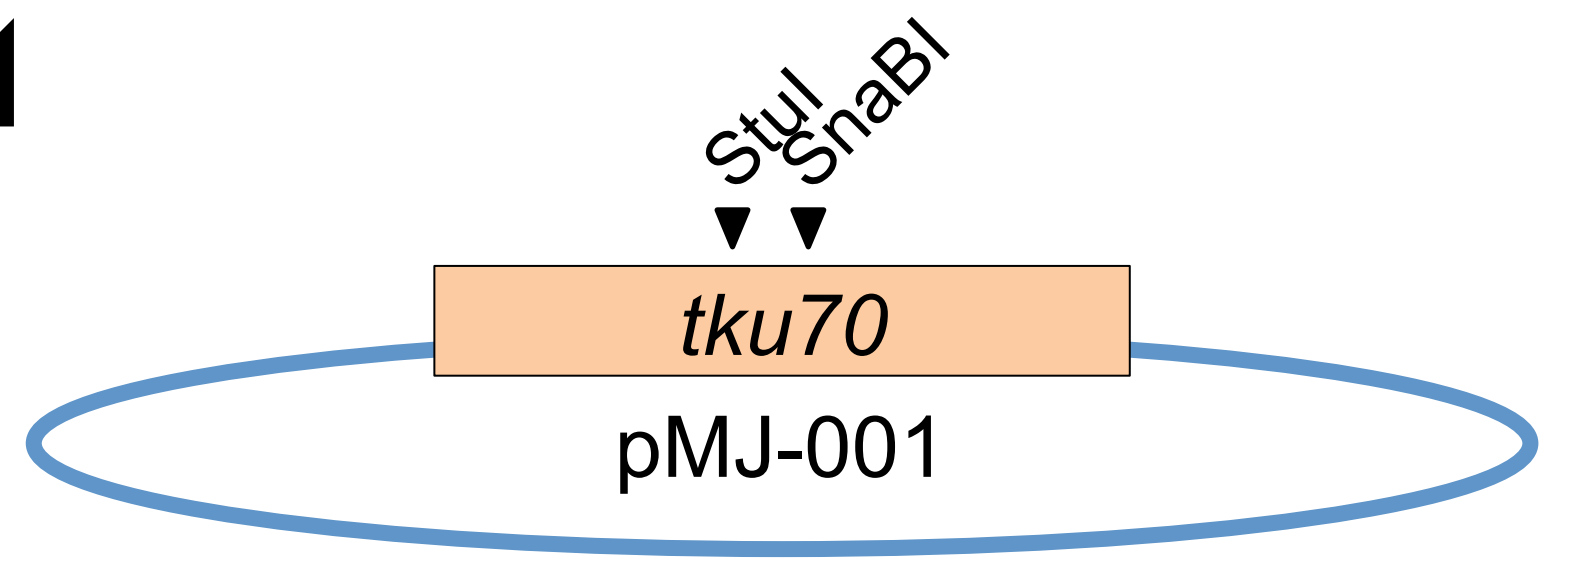

3 ↓

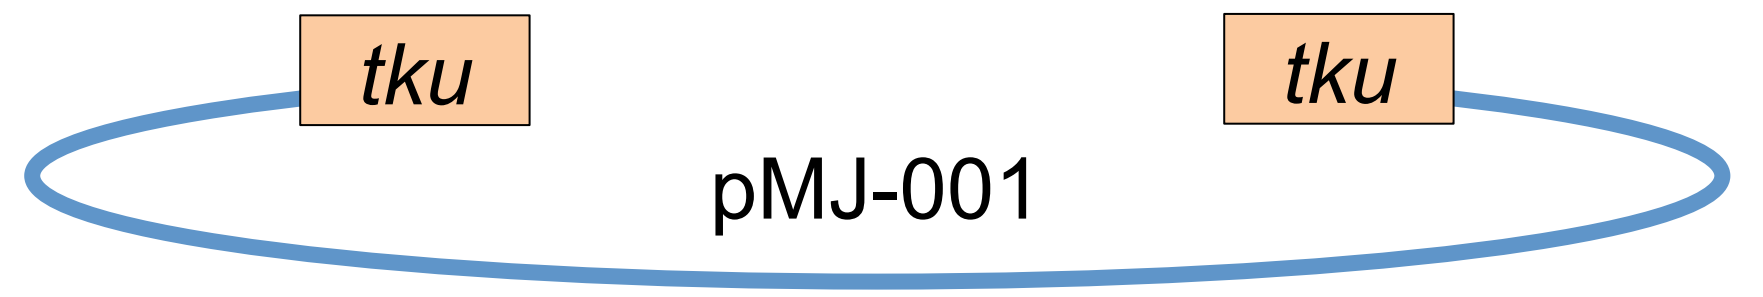

5 ↘

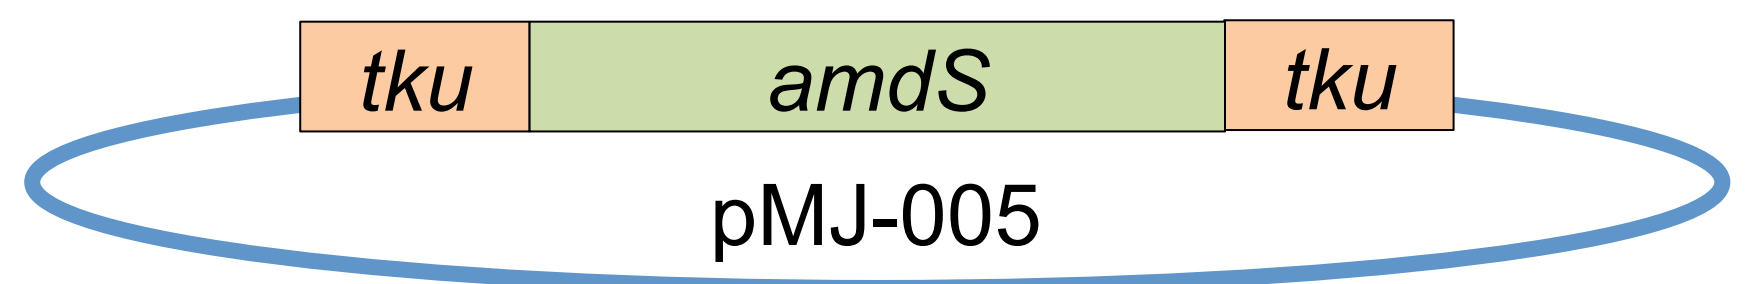

Supplement: 1475-2859-13-33-S7.pdf [file 1475-2859-13-33-S7.pdf]
